# Supplementary material for: Stable and sensitive stimuli-responsive anisotropic hydrogels for sensing ionic strength and pressure
Source: Royal Society of Chemistry journal article supplement (doi:10.1039/c8mh00586a), 2018-01-01
Supplement: c8mh00586a1.pdf [file c8mh00586a1.pdf]

## Supporting Information

# Stable, Stimuli-Responsive Anisotropic Hydrogels for Sensing Ionic Strength and Pressure

*Takayuki Hiratani,<sup>†</sup> Osamu Kose,<sup>†</sup> Wadood Y. Hamad,<sup>‡</sup> Mark J. MacLachlan<sup>\*,†</sup>*

<sup>†</sup>Department of Chemistry, University of British Columbia,

2036 Main Mall, Vancouver, BC, V6T 1Z1, Canada

<sup>‡</sup>FPIInnovations, 2665 East Mall, Vancouver, British Columbia, V6T 1Z4, Canada

[mmaclach@chem.ubc.ca](mailto:mmaclach@chem.ubc.ca)

## 1. Experimental

*General:* All compounds were used as received from Aldrich without further purification. Aqueous dispersions of cellulose nanocrystals (CNCs) were supplied from FPIInnovations in acidic form (6.0 wt%, pH = 1.9), obtained by a procedure described previously.<sup>1</sup> The sizes and degree of sulfation are the same as the ones we have used in a recent study ( $384 \pm 89$  nm x  $14 \pm 14$  nm; zeta potential about -30 mV); the reference includes a TEM image.<sup>2</sup> Thickness of the hydrogels was measured by a digital micrometer (Marathon Management Co.) using a pair of cover glasses to sandwich the hydrogel. Polarized optical microscopy images were acquired on an Olympus BX41 microscope under crossed polarizers. UV-visible spectroscopy was carried out on a Cary 5000 UV-Vis/NIR spectrophotometer using the hydrogels on glass microscope slides perpendicular to the beam path with a holder having a 10 mm diameter circular hole. SEM images were taken on a Hitachi S4700 electron microscope with sputter-coated samples (5.0 nm of Pt-Pd). 2D XRD patterns of the freeze-dried hydrogels glued to a metal post along the shear direction were collected with a Bruker APEX DUO diffractometer equipped with an APEX II CCD detector using Cu K $\alpha$ 1 X-ray beam with a wavelength ( $\lambda$ ) of 0.154 nm at 0.6 mA, 45 kV for 480 s at 60 mm from the detector in transmission mode.

**Preparation of CNC hydrogels (SH1-SH6, UH4):** The aqueous CNC dispersion (10.0 g, 6.0 wt%) was heated at 80 °C with vigorous stirring, then evaporated to give a viscous dispersion (6.0 g, 10.0 wt%). A precursor for the hydrogels was prepared by mixing the 10.0 wt% CNC dispersion (6.0 g) with acrylamide (0.27 g, 3.7 mmol), N,N'-methylenebisacrylamide (14 mg, 94  $\mu$ mol) and 2-hydroxy-4'-(2-hydroxyethoxy)-2-methylpropiophenone (2.7 mg, 12  $\mu$ mol). Appropriate amounts (20, 40, 80, 120, 160, 200 mg) of the precursor were transferred to a space (12 x 25 mm) on glass microscope slides in between two spacers of cellulose acetate tape (0.05

mm thickness each) piled up to be a certain thickness (**SH1**: 0.05, **SH2**: 0.10, **SH3**: 0.20, **SH4**: 0.30, **SH5**: 0.40, **SH6**: 0.50 mm). Another microscope slide (ca. 19 x 25 mm) was pressed down on top of the space to shear the material, sliding it back and forth along the long axis in > thirty repetitions at a rate of ca.1.25 cm/s. A 300 nm ultraviolet-B light source (8 W) was used for the photopolymerization. Ultraviolet irradiation was applied for 2 h to give the sheared CNC hydrogels (**SH1-SH6**). An unsheared CNC hydrogel (**UH4**, thickness: 0.30 mm) was prepared by the same procedure used to make **SH4**, but without the shearing process.

*Calculation of Hermans order parameter (S):*<sup>3,4</sup> From the 2D XRD patterns (Figure 1d and Figure S1), plots of the intensity (I) with respect to azimuthal angle ( $\phi$ ) were obtained by scanning along the arc defined by  $2\theta = 22.9^\circ$ , which corresponds to the (200) reflections of the cellulose I $\beta$  crystals. Then the combination of two equal Lorentz distributions was fit to the plots by the least-squares method to obtain the profile of  $I(\phi)$ . The order parameter, S, was calculated from  $I(\phi)$  following the method described in the previous report using equations 1-3.

$$S = \frac{3\langle \cos^2 \gamma \rangle - 1}{2} \quad (1)$$

$$\langle \cos^2 \gamma \rangle = 1 - 2\langle \cos^2 \phi \rangle \quad (2)$$

$$\langle \cos^2 \phi \rangle = \frac{\int I(\phi) \cos^2 \phi \sin \phi \, d\phi}{\int I(\phi) \sin \phi \, d\phi} \quad (3)$$

where  $\gamma$  is the angle between the (200) planes and the shear direction.

*Calculation of the birefringence:*<sup>5</sup> The transmittance for the perpendicular ( $T_{\perp}$ ) and parallel ( $T_{\parallel}$ ) orientations of the analyzer relative to the polarizer are given by equations (5) and (6), where  $\theta$  is the angle between the polarization axis of the polarizer and the shear direction, fixed at  $45^{\circ}$  in the measurements and  $\delta$  is a phase difference between the two polarizations expressed by equation (4) where  $d$  is the thickness of the sample and  $\lambda$  is the wavelength of light. Birefringence,  $\Delta n$ , in equations (7) and (8) can be derived from the combination of equations (4), (5) and (6), where  $k$  is a non-negative integer that describes the order of the solution. From basic principles of these optically transparent materials, we know that  $\Delta n$  is continuous across the visible spectrum. It can also be shown that the order  $k$  is constant between maximum and minimum in  $T_{\perp} / T_{\parallel}$ . Using this information, it is therefore possible to manually choose  $k$  for each set of data.

$$\delta = \frac{2\pi \Delta n d}{\lambda} \quad (4)$$

$$T_{\perp} = \sin(2\theta) \sin^2 \frac{\delta}{2} \quad (5)$$

$$T_{\parallel} = \sin(2\theta) \cos^2 \frac{\delta}{2} \quad (6)$$

$$\Delta n = \frac{\lambda}{2\pi d} \left[ k\pi + 2\tan^{-1} \sqrt{\frac{T_{\perp}}{T_{\parallel}}} \right] \quad k = 0, 2, 4, \dots \quad (7)$$

$$\Delta n = \frac{\lambda}{2\pi d} \left[ (k+1)\pi - 2\tan^{-1} \sqrt{\frac{T_{\perp}}{T_{\parallel}}} \right] \quad k = 1, 3, 5, \dots \quad (8)$$

Since our hydrogels are optically transparent throughout the visible region, the refractive index can be modeled by the first-order Sellmeier dispersion:  $n(\lambda)^2 - 1 = a + b\lambda^2/(\lambda^2 - \lambda_0^2)$ , where  $a$ ,  $b$ , and  $\lambda_0$  are constants. It can be reduced to the simpler Cauchy formula:  $n(\lambda) = A + B/\lambda^2$ , where  $A$  and  $B$  are constants for a given material. The dispersion of our birefringent hydrogels is therefore modeled by the following equation (9):

$$\Delta n(\lambda) = n_e(\lambda) - n_o(\lambda) \approx \Delta n_\infty + \frac{C}{\lambda^2} \quad (9)$$

where  $\Delta n_\infty$  is the birefringence at long wavelengths and  $C$  is a constant. Note that the absolute values of the ordinary ( $n_o$ ) and extraordinary ( $n_e$ ) indices are not required to determine  $\Delta n(\lambda)$ . In order to calculate the dispersion of the birefringence, we combine equations (7), (8) and (9) and use least-squares minimization to find the parameters  $\Delta n_\infty$  and  $C$  that give the closest fit to our experimental data.

*Swelling ratio:* Swelling ratio of the hydrogel was evaluated by measuring the length ( $L$ ) and the width ( $W$ ) from the image taken under crossed polarizers (50 x 50 mm) and the thickness ( $d$ ) measured by a digital micrometer (Marathon Management Co.) using a pair of cover glasses to sandwich the hydrogel.

*Pressure sensing:* For quantification of the pressure applied to the hydrogel, we used a device in which four screws running through the center of the springs (Century Spring Corp. B14-23;

spring rate,  $k = 0.54 \text{ N/mm}$ ) penetrate through the screw holes at every corner to tighten two aluminum plates with a hole ( $\phi 10 \text{ mm}$ ) at the center as a window for optical measurements. A linear polarizer ( $50 \times 50 \text{ mm}$ ) is fixed on the aluminum plate and a glass plate ( $50 \times 50 \text{ mm}$ ) on another plate so that the hydrogel can be homogeneously compressed between the windows. Pressure ( $P$ ) applied to the hydrogel placed between the polarizer and the glass plate can be quantified based on a change in the length of the springs from the initial position ( $\Delta x \text{ (mm)}$ ) measured using digital calipers (Mastercraft®) through tightening the screws, calculated by the expression:

$$P \text{ (kPa)} = \frac{4 \times 0.54 \Delta x}{A} \times 10^{-3}$$

where  $A \text{ (m}^2\text{)}$  is the contact area of the hydrogel either to the polarizer or the glass plate. The value of  $A$  was estimated from the thickness ( $d$ ), the initial thickness ( $d_0$ ) and the initial area ( $A_0$ ) of the hydrogel assuming that the volume doesn't change with the applied pressure:

$$A = A_0 \times \frac{d_0}{d}$$

## 2. Supporting Figures

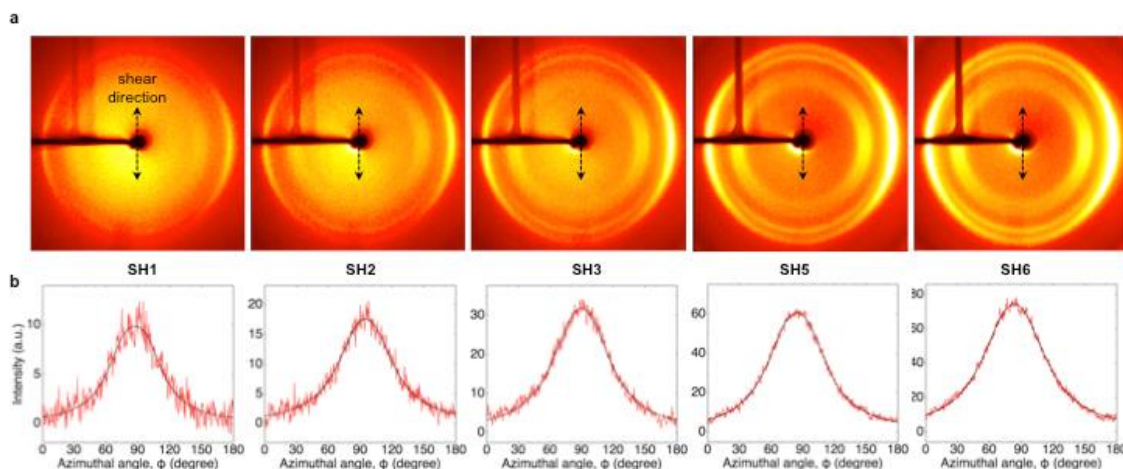

**Figure S1.** Structural characterization of the sheared CNC hydrogels (**SH1-SH3**, **SH5** and **SH6**). (a) 2D XRD patterns and (b) plots of the intensity with respect to azimuthal angle ( $\phi$ ) were obtained by scanning along the arc defined by  $2\theta = 22.9^\circ$  for **SH1-SH3**, **SH5** and **SH6** showing the anisotropic distribution in diffraction intensity.

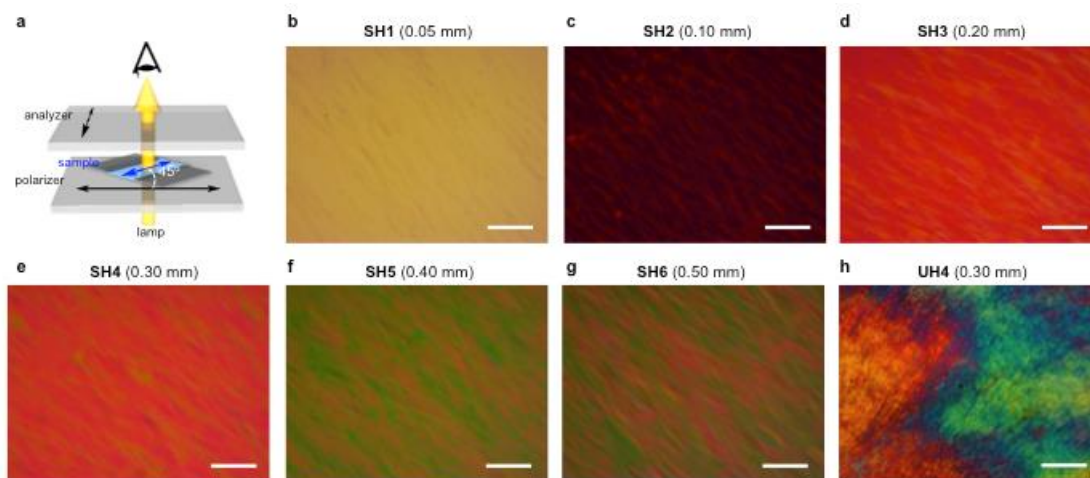

**Figure S2.** POM images of **SH1-SH6** and **UH4**. (a) The experimental setup for POM images of **SH1-SH6** placed with the shear direction at  $45^\circ$  with respect to the polarization axis of each of the crossed polarizers. (b)-(g) Monochrome POM images of **SH1-SH6** indicating the mono-domain anisotropic structure with unidirectional alignment of the CNCs. (h) A multicolored POM image of **UH4** demonstrates its multi-domain structure. All scale bars represent  $50\ \mu\text{m}$ .

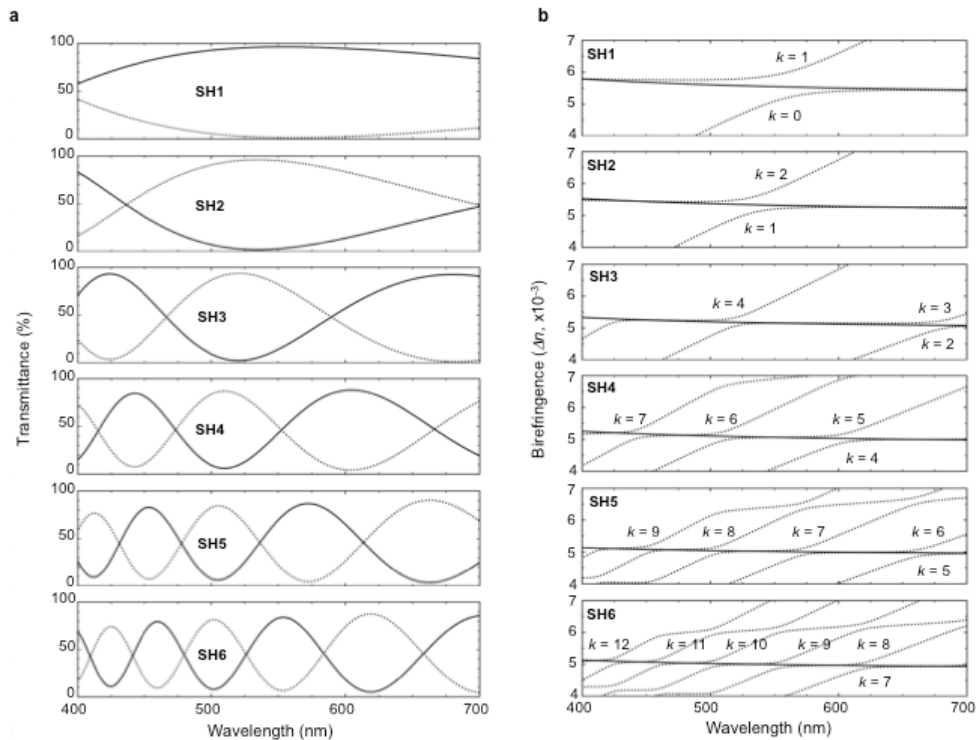

**Figure S3.** Data for the calculation of the birefringence dispersion for the sheared CNC hydrogels (SH1-SH6). (a) A pair of transmission spectra for SH1-SH6 placed with the shear direction at  $45^\circ$  with respect to the polarization axis at  $45^\circ$  under crossed and parallel polarizers. (b) The birefringence dispersions calculated using equations (7), (8) with the indicated constants  $k$  and curves fitted using Cauchy formula, equation (9).

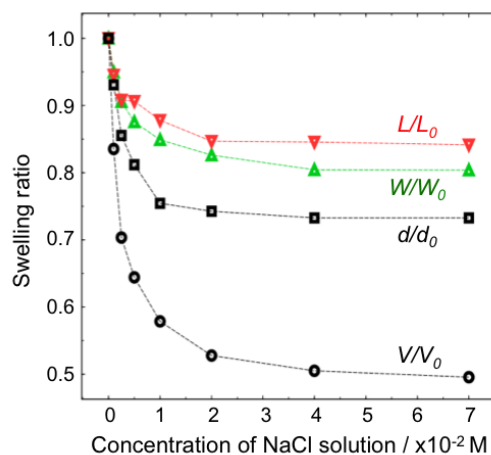

**Figure S4.** Swelling behavior of the unsheared CNC hydrogel (UH4). Swelling ratio ( $V/V_0$ ,  $W/W_0$ ,  $d/d_0$  and  $L/L_0$ ) of UH4 with different concentrations of NaCl solution.



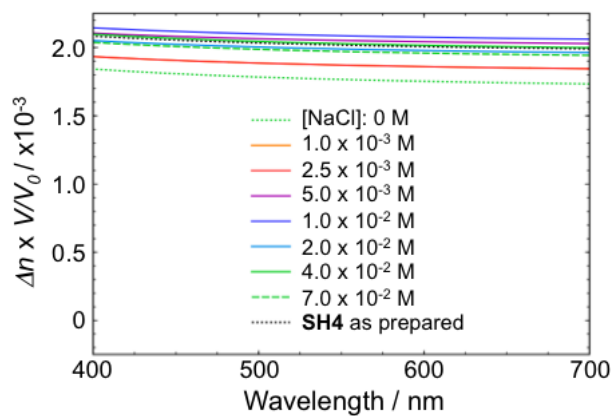

**Figure S5.** The birefringence ( $\Delta n$ ) dispersions of **SH4** swelled in different concentrations of NaCl solution multiplied by the volume swelling ratio ( $V/V_0$ ) to normalize the birefringence to account for the change in volume. The birefringence dispersion of **SH4** as prepared is also shown as a reference.

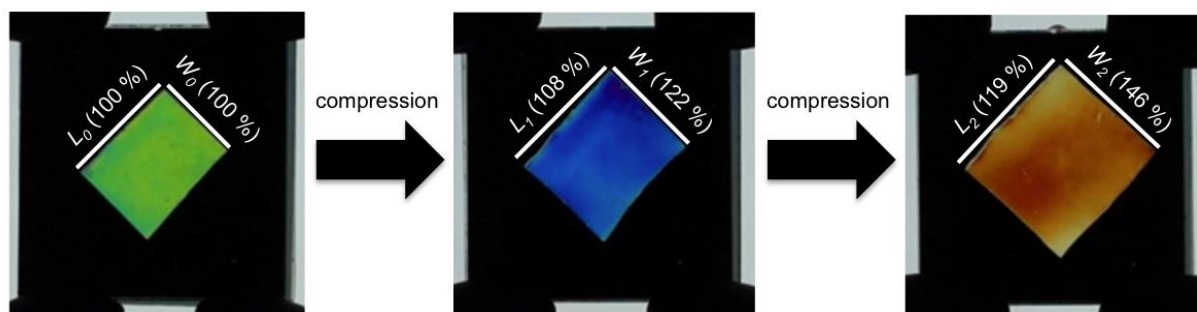

**Figure S6.** The anisotropic shape variation of the water-swelled sheared CNC hydrogel (**SH4**) throughout the compression.

## References

- 1 W. Y. Hamad, T. Q. Hu, *Can. J. Chem. Eng.* 2010, **88**, 392–402.
- 2 A.-L. Oechsle, L. Lewis, W. Y. Hamad, S. G. Hatzikiriakos and M. J. MacLachlan, *Chem. Mater.* 2018, **30**, 376-385.
- 3 E. E. Ureña-Benavides, C. L. Kitchens, *Macromolecules* 2011, **44**, 3478–3484.
- 4 J. A. Diaz, X. Wu, A. Martini, J. P. Youngblood, R. J. Moon, *Biomacromolecules* 2013, **14**, 2900–2908.
- 5 P. Bhupathi, L. Jaworski, J. Hwang, D. B. Tanner, S. Obukov, Y. Lee, N. Mulders, *New J. Phys.* 2010, **12**, 103016.
